# Supplementary material
Source: PubMed Central journal article supplement (PMC9949854)
Supplement: mmc1.pdf [file mmc1.pdf]

# THE LANCET

## Supplementary appendix 1

This translation in Chinese was submitted by the authors and we reproduce it as supplied. It has not been peer reviewed. *The Lancet's* editorial processes have only been applied to the original in English, which should serve as reference for this manuscript.

此简体中文译文由作者提交，我方按照提供的版本刊登。此译文并未经过同行审阅。医学期刊《柳叶刀》的编辑流程仅适用于英文原稿，英文原稿应作为此手稿的参考。

Supplement to: Pan Y, Wang L, Feng Z, et al. Characterisation of SARS-CoV-2 variants in Beijing during 2022: an epidemiological and phylogenetic analysis. *Lancet* 2023; published online Feb 8. [https://doi.org/10.1016/S0140-6736\(23\)00129-0](https://doi.org/10.1016/S0140-6736(23)00129-0).

## 摘要

### 背景

在“动态清零”的政策下，在 2022 年 12 月之前北京并没有持续的本地传播。随着中国防疫政策的调整，最近新冠肺炎感染病例数逐渐增加，病毒的传播引起人们担忧是否有新的新冠变异株出现。在过去三年，我们开展了新冠病毒的全基因组测序常规监测工作。新冠病毒全基因组序列的时空分析对于全球应对新冠病毒的流行至关重要。

### 方法

在过去三年，我们在北京持续收集了输入病例和本土病例的呼吸道样本进行监测与检测。本研究我们分析了 2022 年 1 月到 12 月的数据，利用二代测序方法获得病毒的全基因组序列，并进行基因进化和系统动力学分析。

### 结果

在本研究中，我们获得了 2994 条新冠病毒全基因组序列，其中 2881 条序列质量较高，用于进一步的分析。从 2022 年 11 月 14 日至 12 月 20 日，对 413 个样本进行全基因组测序，其中包括 350 例本土病例和 63 例输入病例序列。2022 年全年的本土和输入病例序列分属于 123 个 PANGO 分支，并没有发现新的变异株。从 2022 年 11 月 14 日起，在北京 BF.7 和 BA.5.2 占据主导，占本土病例的 90%（315 条来自这两个分支）。2022 年 11 月 14 日后，BA.5.2 和 BF.7 的有效种群数量均显示增加。

### 发现

自 2022 年 11 月 14 日以来，BF.7 和 BA.5.2 变异株在北京共同流行，并没有出现新的变异株。虽然我们的数据仅仅来自北京，但是由于频繁的人口流动以及病毒的较高传播力，此结果也可以部分代表中国的流行情况。
