# Supplementary material
Source: PubMed Central journal article supplement (PMC9949854)
Supplement: mmc2.pdf [file mmc2.pdf]

# THE LANCET

## Supplementary appendix 2

This appendix formed part of the original submission and has been peer reviewed. We post it as supplied by the authors.

Supplement to: Pan Y, Wang L, Feng Z, et al. Characterisation of SARS-CoV-2 variants in Beijing during 2022: an epidemiological and phylogenetic analysis. *Lancet* 2023; published online Feb 8. [https://doi.org/10.1016/S0140-6736\(23\)00129-0](https://doi.org/10.1016/S0140-6736(23)00129-0).

# Supplemental Results

## Supplemental Figure 1

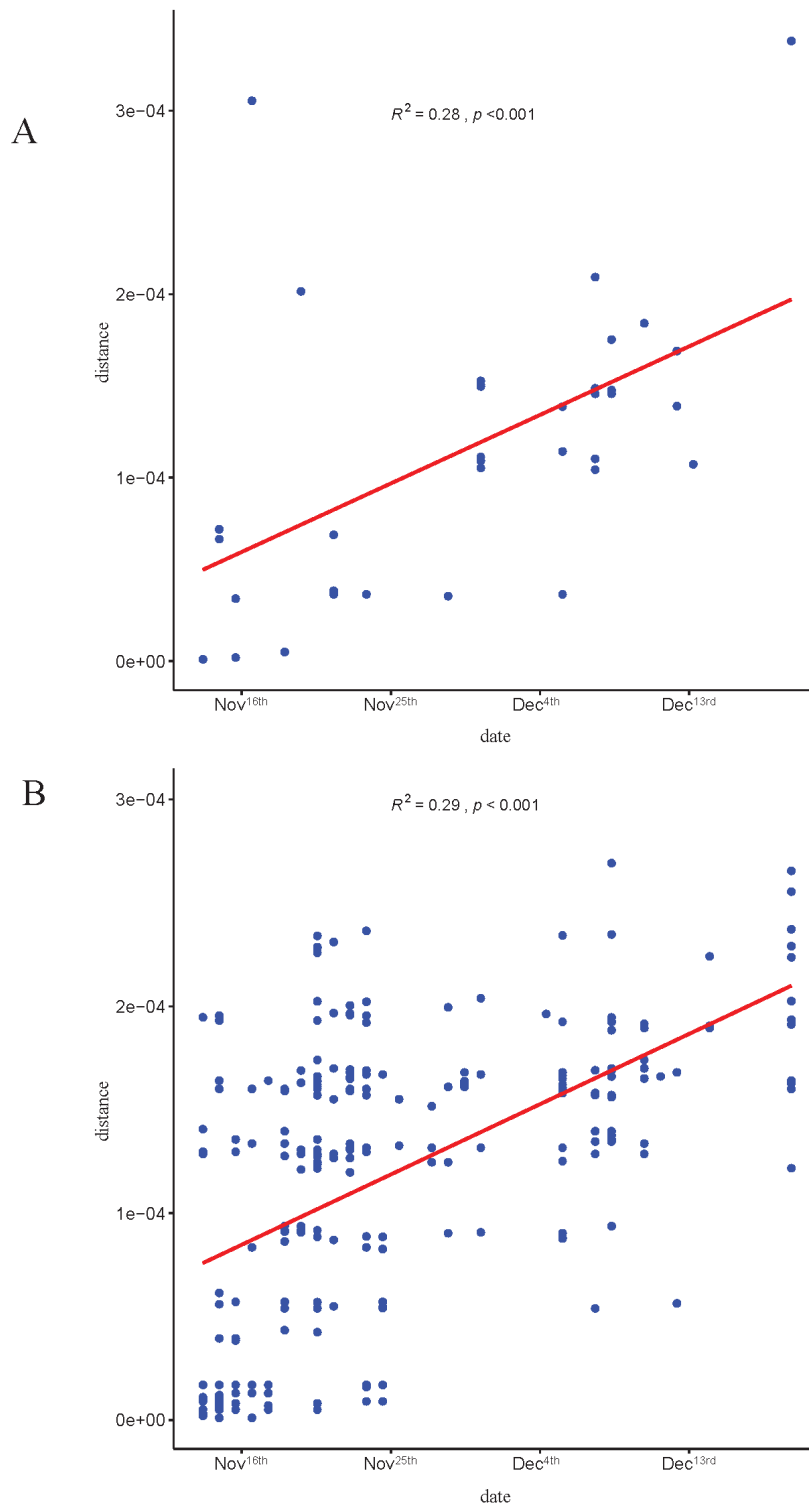

The temporal molecular evolutionary signal in our datasets.

A. Regression of root-to-tip divergence and sampling date for BA.5.2 genomic data used in this study

B. Regression of root-to-tip divergence and sampling date for BF.7 genomic data used in this study

**Supplemental Figure 2**

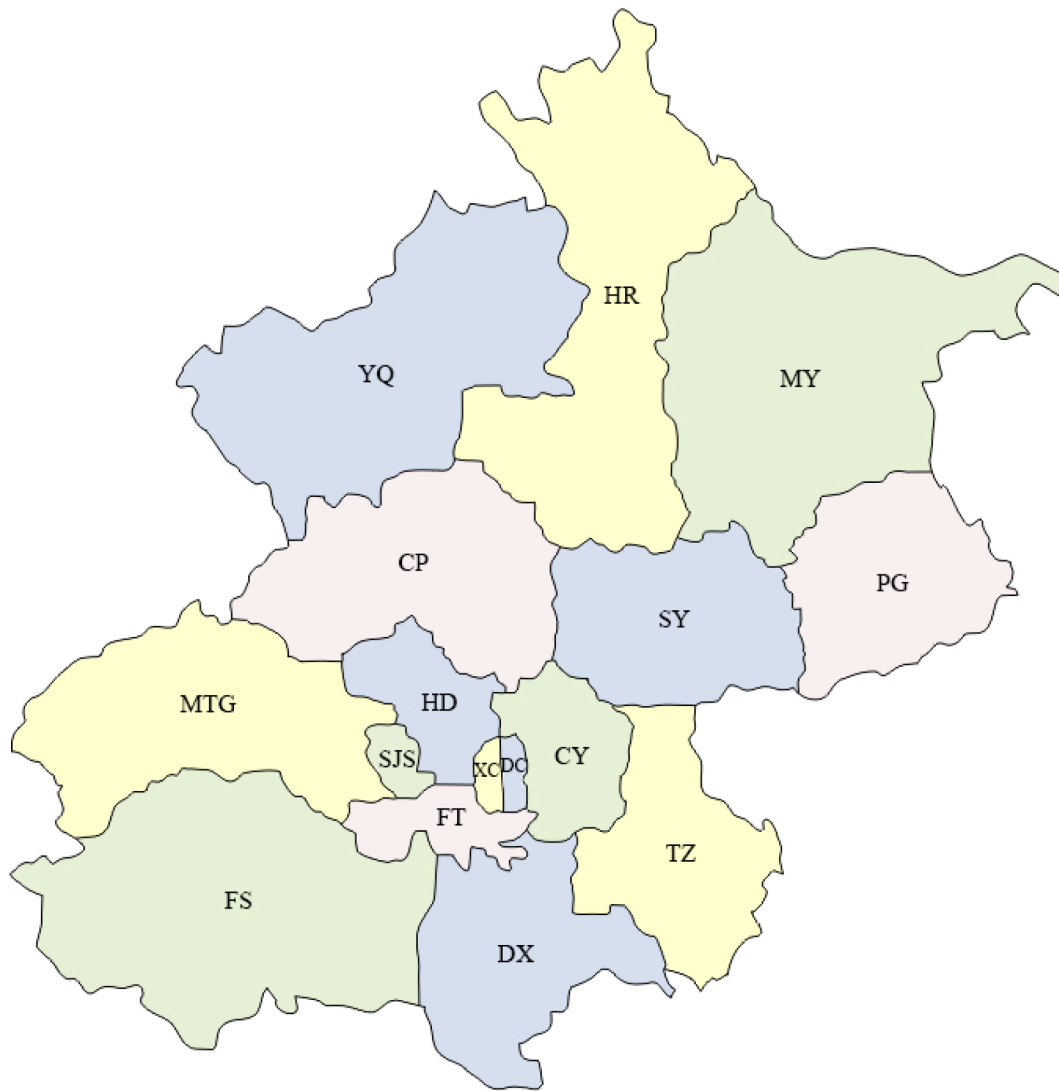

Supplemental Figure 2. The map of Beijing Municipality

The Jingkai (JK) District locates in Daxing (DX) District, and was not shown in the map.

### Supplemental Figure 3

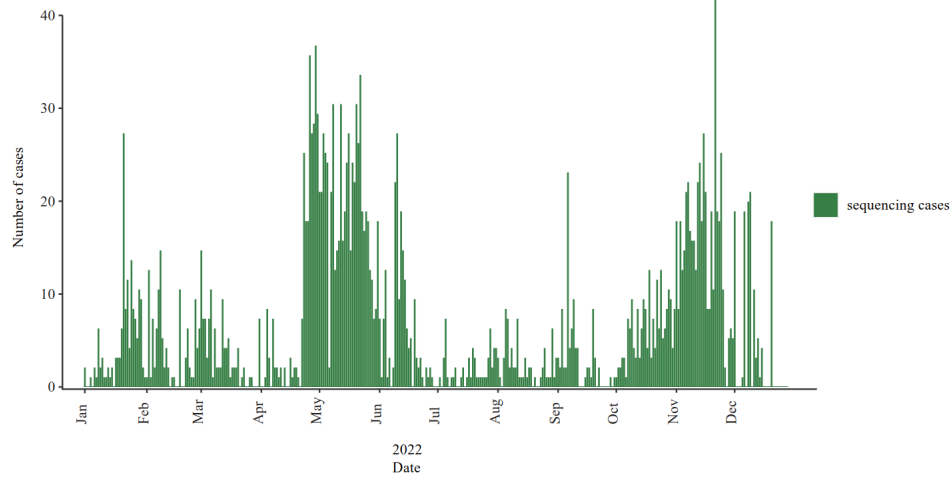

Supplemental Figure 3. Distribution of sequences analyzed in this study in Beijing from January 2022 to 13 November 2022

## Supplemental Figure 4

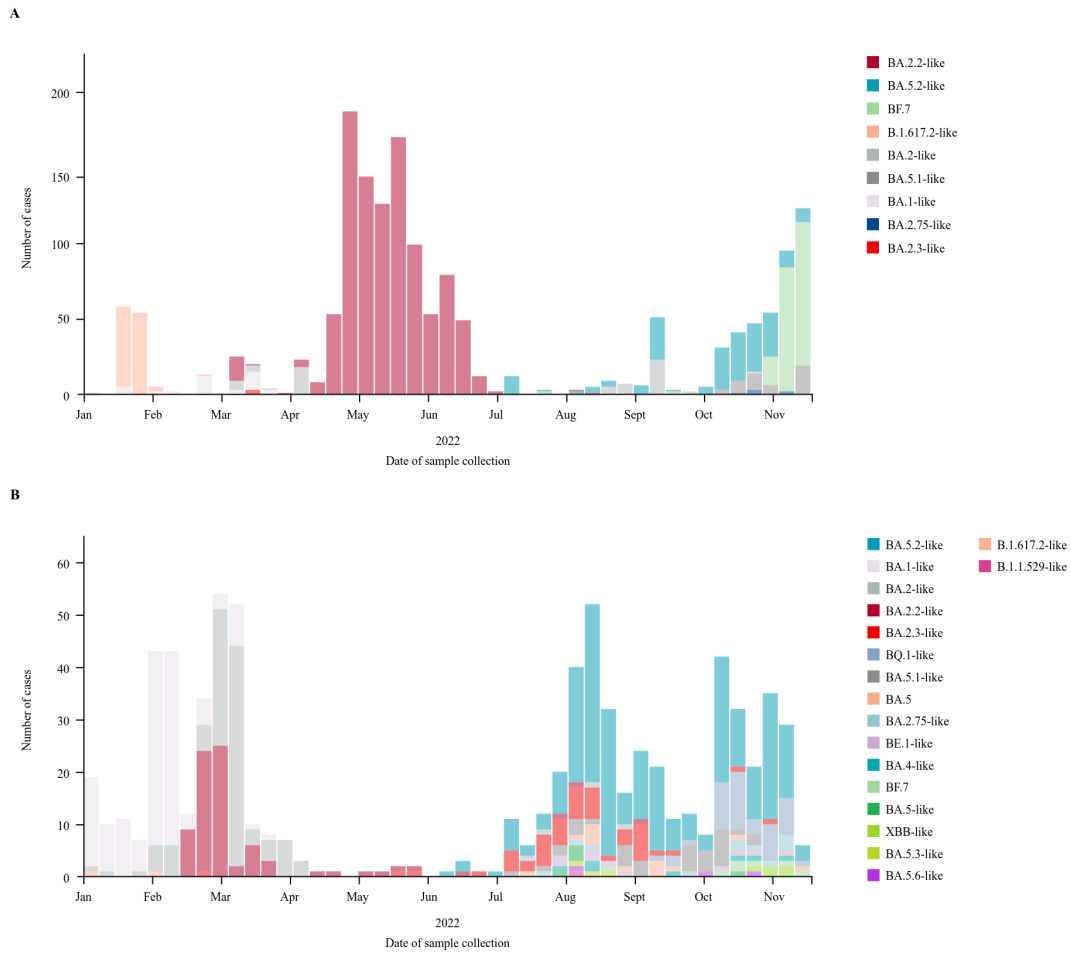

Supplemental Figure 4. Distribution of SARS-CoV-2 subvariants identified in Beijing from January 2022 to 13 November 2022.

A. Distribution of local SARS-CoV-2 subvariants identified in Beijing from January 2022 to 13 November 2022.

B. Distribution of imported SARS-CoV-2 subvariants identified in Beijing from January 2022 to 13 November 2022.

## Supplemental Table

Supplemental Table 1 Log-marginal likelihood estimates from model selection by using the path-sampling (PS) and stepping-stone (SS) approaches for both datasets.

| Dataset | Coalescent model | Log marginal likelihood |                     |
|---------|------------------|-------------------------|---------------------|
|         |                  | path-sampling (PS)      | stepping-stone (SS) |
| BA.5.2  | Constant         | -41018.62609            | -41018.47585        |
|         | Exponential      | -41018.6987             | -41018.72858        |
|         | Skyline          | -41011.92666            | -41011.78615        |
| BF.7    | Constant         | -42483.07814            | -42483.6583         |
|         | Exponential      | -42477.17172            | -42477.82076        |
|         | Skyline          | -42455.09033            | -42455.99873        |

Supplemental Table 2 The spatial distribution of sequencing samples in Beijing in 2022

|          | District    | Abbreviation | Number of sequences (%) |
|----------|-------------|--------------|-------------------------|
| Urban    | Chaoyang    | CY           | 467 (33.5%)             |
|          | Fengtai     | FT           | 309 (22.17%)            |
|          | Haidian     | HD           | 222 (15.93%)            |
|          | Dongcheng   | DC           | 116 (8.32%)             |
|          | Xicheng     | XC           | 104 (7.46%)             |
|          | Shijingshan | SJS          | 21 (1.51%)              |
| Suburban | Fangshan    | FS           | 165 (11.84%)            |
|          | Changping   | CP           | 114 (8.18%)             |
|          | Tongzhou    | TZ           | 71 (5.09%)              |
|          | Daxing      | DX           | 55 (3.95%)              |
|          | Shunyi      | SY           | 40 (2.87%)              |
|          | Huairou     | HR           | 27 (1.94%)              |
|          | Mentougou   | MTG          | 25 (1.79%)              |
|          | Pinggu      | PG           | 15 (1.08%)              |
|          | Jingkai     | JK           | 10 (0.72%)              |
|          | Miyun       | MY           | 8 (0.57%)               |
|          | Yanqing     | YQ           | 9 (0.65%)               |
|          | Total       |              |                         |

\*, Among all 2,033 sequences obtained from local infections, 1778 sequences with geographic information were shown.

Supplemental Table 3. The countries and regions of origin of imported cases identified in Beijing in 2022

| Countries and regions    | Number of sequences (%) |
|--------------------------|-------------------------|
| Hong Kong, SAR, China    | 160 (21.86%)            |
| Russia                   | 108 (14.75%)            |
| Taiwan, China            | 95 (12.98%)             |
| Germany                  | 70 (9.56%)              |
| Republic of Korea        | 53 (7.24%)              |
| United Arab Emirates     | 41 (5.6%)               |
| France                   | 38 (5.19%)              |
| The United Kingdom       | 24 (3.28%)              |
| Japan                    | 20 (2.73%)              |
| United States of America | 10 (1.37%)              |
| Italy                    | 9 (1.23%)               |
| Austria                  | 7 (0.96%)               |
| Turkey                   | 6 (0.82%)               |
| Guinea                   | 5 (0.68%)               |
| Angola                   | 4 (0.55%)               |
| Denmark                  | 4 (0.55%)               |
| Kazakhstan               | 4 (0.55%)               |
| Switzerland              | 4 (0.55%)               |
| Sweden                   | 3 (0.41%)               |
| Senegal                  | 3 (0.41%)               |
| Ukraine                  | 3 (0.41%)               |
| Spain                    | 3 (0.41%)               |
| Indonesia                | 3 (0.41%)               |
| Ethiopia                 | 2 (0.27%)               |
| Ireland                  | 2 (0.27%)               |
| Australia                | 2 (0.27%)               |
| Bahamas                  | 2 (0.27%)               |
| Bulgaria                 | 2 (0.27%)               |
| Congo                    | 2 (0.27%)               |
| Romania                  | 2 (0.27%)               |
| Mongolia                 | 2 (0.27%)               |
| South Africa             | 2 (0.27%)               |



---

|                                  |            |
|----------------------------------|------------|
| Cyprus                           | 2 (0.27%)  |
| Slovakia                         | 2 (0.27%)  |
| Thailand                         | 2 (0.27%)  |
| Greece                           | 2 (0.27%)  |
| Singapore                        | 2 (0.27%)  |
| Zambia                           | 2 (0.27%)  |
| Albania                          | 1 (0.14%)  |
| Estonia                          | 1 (0.14%)  |
| Pakistan                         | 1 (0.14%)  |
| Brazil                           | 1 (0.14%)  |
| Belarus                          | 1 (0.14%)  |
| Equatorial Guinea                | 1 (0.14%)  |
| Dominican Republic               | 1 (0.14%)  |
| Democratic Republic of the Congo | 1 (0.14%)  |
| Netherlands                      | 1 (0.14%)  |
| Guinea-Bissau                    | 1 (0.14%)  |
| Canada                           | 1 (0.14%)  |
| Cameroon                         | 1 (0.14%)  |
| Latvia                           | 1 (0.14%)  |
| Lithuania                        | 1 (0.14%)  |
| Madagascar                       | 1 (0.14%)  |
| Mauritius                        | 1 (0.14%)  |
| Namibia                          | 1 (0.14%)  |
| Portugal                         | 1 (0.14%)  |
| Saudi Arabia                     | 1 (0.14%)  |
| Sudan                            | 1 (0.14%)  |
| Tajikistan                       | 1 (0.14%)  |
| Uzbekistan                       | 1 (0.14%)  |
| Hungary                          | 1 (0.14%)  |
| Iraq                             | 1 (0.14%)  |
| Israel                           | 1 (0.14%)  |
| Total                            | 732 (100%) |

---

Supplemental Table 4. The distribution of imported sub-variants identified in Beijing from Nov 14<sup>th</sup> to Dec 20<sup>th</sup>

| Lineage | Number of sequences (%) |
|---------|-------------------------|
| BQ.1    | 20 (31.7%)              |
| BA.5.2  | 14 (22.2%)              |
| XBB.1   | 6 (9.5%)                |
| BF.7    | 5 (7.9%)                |
| BA.5.9  | 5 (7.9%)                |
| BA.5.1  | 3 (4.8%)                |
| CM.8    | 1 (1.6%)                |
| CL.1    | 1 (1.6%)                |
| BW.1    | 1 (1.6%)                |
| BR.2.1  | 1 (1.6%)                |
| BN.1.4  | 1 (1.6%)                |
| BF.28   | 1 (1.6%)                |
| BE.4    | 1 (1.6%)                |
| BA.5    | 1 (1.6%)                |
| BA.4    | 1 (1.6%)                |
| BA.2    | 1 (1.6%)                |
| Total   | 63 (100%)               |
